# Supplementary material
Source: publisher figshare collection journal article supplement (https://gsajournals.figshare.com/ndownloader/files/18105296)
Supplement: Supplementary file 1 [file 18105296]

## Sheet: Hoja1
Table S4. Genes under positive selective per chromosome
Chromosome_1	Chromosome_2	Chromosome_3	Chromosome_4	Chromosome_8
Tc01v2_g014990	Tc02v2_g015820	Tc03v2_g004890	Tc04v2_g004890	Tc08v2_g012500
Tc01v2_g016260	Tc02v2_g015840	Tc03v2_g005030	Tc04v2_g005380	Tc08v2_g013580
Tc01v2_g019170	Tc02v2_g017450	Tc03v2_g005750	Tc04v2_g005640	Tc08v2_g013590
Tc01v2_g019650	Tc02v2_g019980	Tc03v2_g006130	Tc04v2_g022470	Tc08v2_g016200
Tc01v2_g019950	Tc02v2_g024810	Tc03v2_g006420	Tc04v2_g022480	Tc08v2_g016430
	Tc02v2_g029430	Tc03v2_g006430	Tc04v2_g022490	Tc08v2_g016440
	Tc02v2_g029450	Tc03v2_g015430	Tc04v2_g022570	Tc08v2_g016450
	Tc02v2_g029460	Tc03v2_g017130	Tc04v2_g022580	Tc08v2_g016460
	Tc02v2_g029470	Tc03v2_g017150	Tc04v2_g022590	Tc08v2_g016470
	Tc02v2_g029480	Tc03v2_g017160	Tc04v2_g022600	Tc08v2_g016480
	Tc02v2_g029490	Tc03v2_g017170	Tc04v2_g022620
	Tc02v2_g029510	Tc03v2_g017780	Tc04v2_g022630
	Tc02v2_g029520	Tc03v2_g026400	Tc04v2_g022640
	Tc02v2_g029530	Tc03v2_g026410	Tc04v2_g022650
	Tc02v2_g029540	Tc03v2_g026420	Tc04v2_g022670
	Tc02v2_g029560	Tc03v2_g026440	Tc04v2_g022680
	Tc02v2_g029570	Tc03v2_g026450	Tc04v2_g022690
	Tc02v2_g029580	Tc03v2_g026460	Tc04v2_g022700
	Tc02v2_g029590	Tc03v2_g026470	Tc04v2_g022710
	Tc02v2_g029600	Tc03v2_g026490	Tc04v2_g022720
	Tc02v2_g029610	Tc03v2_g026500	Tc04v2_g022730
	Tc02v2_g029620	Tc03v2_g026510	Tc04v2_g022740
	Tc02v2_g029630	Tc03v2_g026520	Tc04v2_g022750
	Tc02v2_g029640	Tc03v2_g026530	Tc04v2_g022760
	Tc02v2_g029650	Tc03v2_g026540	Tc04v2_g022770
	Tc02v2_g029720	Tc03v2_g026550	Tc04v2_g022790
	Tc02v2_g029730	Tc03v2_g026560	Tc04v2_g022800
	Tc02v2_g030080	Tc03v2_g026570	Tc04v2_g022820
	Tc02v2_g030090	Tc03v2_g026580	Tc04v2_g022830
	Tc02v2_g030110	Tc03v2_g026590	Tc04v2_g022840
	Tc02v2_g030120	Tc03v2_g026600	Tc04v2_g022850
	Tc02v2_g030130	Tc03v2_g026610	Tc04v2_g022860
	Tc02v2_g030940	Tc03v2_g026620	Tc04v2_g022870
	Tc02v2_g030950	Tc03v2_g026630	Tc04v2_g022880
	Tc02v2_g030960	Tc03v2_g026640	Tc04v2_g022890
	Tc02v2_g030970	Tc03v2_g026650	Tc04v2_g023790
		Tc03v2_g026660	Tc04v2_g023800
		Tc03v2_g026670
		Tc03v2_g026680
